# Supplementary material
Source: HighWire-hosted journal article supplement (http://www.jrheum.org/highwire/filestream/29781/field_highwire_adjunct_files/0/150836DataSuppl.pdf)
Supplement: 150836DataSuppl.pdf [file 150836DataSuppl.pdf]

**ONLINE SUPPLEMENTARY DATA**

Supplementary Table 1: The independent genome-wide significant single SNPs in RACI-UK\*.

| Order | SNP        | chr | pos         | OR   | P <sub>gwas</sub> | P <sub>final</sub> |
|-------|------------|-----|-------------|------|-------------------|--------------------|
| 1     | rs6931277  | 6   | 32 615 580  | 2.53 | 7.23E-182         | 2.30E-191          |
| 2     | rs17496549 | 6   | 32 441 931  | 1.43 | 5.17E-18          | 7.24E-59           |
| 3     | rs2476601  | 1   | 113 834 946 | 1.72 | 1.96E-37          | 1.07E-28           |
| 4     | rs2596560  | 6   | 31 387 541  | 1.22 | 4.35E-10          | 1.26E-19           |
| 5     | rs1431403  | 6   | 33 079 254  | 0.77 | 1.05E-16          | 7.62E-11           |
| 6     | rs71624119 | 5   | 56 144 903  | 0.8  | 1.13E-10          | 7.41E-09           |
| 7     | rs9275602  | 6   | 32 715 035  | 1.37 | 8.86E-21          | 1.54E-06           |
| 8     | rs928722   | 6   | 137 652 695 | 1.2  | 4.81E-08          | 1.62E-06           |
| 9     | rs2524084  | 6   | 31 273 862  | 1.3  | 1.33E-19          | 1.88E-05           |
| 10    | rs4540292  | 6   | 31 349 405  | 1.17 | 3.46E-08          | 5.74E-05           |
| 11    | rs2844804  | 6   | 29 974 349  | 1.21 | 2.30E-11          | 7.96E-05           |
| 12    | rs17499655 | 6   | 32 704 358  | 1.31 | 4.05E-12          | 3.46E-05           |
| 13    | rs10484565 | 6   | 32 827 255  | 1.52 | 6.81E-18          | 8.29E-05           |
| 14    | rs13196329 | 6   | 32 357 594  | 1.9  | 1.26E-09          | 3.84E-04           |
| 15    | rs17422797 | 6   | 32 297 751  | 1.56 | 3.49E-19          | 4.25E-05           |
| 16    | rs3819721  | 6   | 32 837 021  | 1.63 | 2.37E-56          | 1.18E-03           |
| 17    | rs2235359  | 6   | 28 247 863  | 0.76 | 1.71E-10          | 3.27E-03           |
| 18    | rs9276826  | 6   | 32 862 791  | 1.29 | 1.24E-08          | 3.42E-03           |
| 19    | rs1503836  | 1   | 113 998 876 | 1.19 | 1.67E-09          | 1.06E-02           |
| 20    | rs13193645 | 6   | 32 628 547  | 1.27 | 1.81E-10          | 1.36E-02           |

\*: Order - the order of SNPs selected in the forward selection process;

chr: chromosome; pos: base pair position; OR: odds ratio

P<sub>gwas</sub>: the P value from the GWAS analysis;

P<sub>final</sub>: the P value in the model fitting all independent SNPs

Supplementary Table 2: Immunochip-wide significant non-MHC SNP pairs in RACI-UK and their replication in RACI-US and RACI-SE\*.

| SNP1             | SNP2              | chr1     | pos1             | chr2     | pos2             | P_SNP1_UK      | P_SNP2_UK      | P <sub>int</sub> _UK | df <sub>int</sub> _UK | P_SNP1_US      | P_SNP2_US      | P <sub>int</sub> _US | df <sub>int</sub> _US | P_SNP1_SE      | P_SNP2_SE      | P <sub>int</sub> _SE | df <sub>int</sub> _SE |
|------------------|-------------------|----------|------------------|----------|------------------|----------------|----------------|----------------------|-----------------------|----------------|----------------|----------------------|-----------------------|----------------|----------------|----------------------|-----------------------|
| rs2244013        | rs6688452         | 1        | 3425966          | 1        | 24910443         | 2.6E-01        | 6.2E-01        | 6.8E-09              | 4                     | 1.9E-01        | 3.4E-01        | 2.3E-01              | 4                     | 8.3E-01        | 3.5E-01        | 6.5E-01              | 4                     |
| rs41283518       | rs4663254         | 1        | 113913179        | 2        | 237355421        | 9.8E-01        | 5.5E-01        | 1.8E-09              | 4                     | 2.9E-01        | 2.3E-01        | 1.2E-01              | 3                     | 4.5E-01        | 5.1E-01        | 5.0E-01              | 4                     |
| rs4656078        | rs1010779         | 1        | 89013391         | 7        | 68973967         | 3.2E-01        | 4.9E-01        | 2.1E-10              | 4                     | 1.1E-01        | 4.5E-01        | 7.1E-01              | 4                     | 5.6E-01        | 3.5E-01        | 1.0E-01              | 4                     |
| rs6681720        | rs17340646        | 1        | 173415283        | 7        | 129082460        | 2.0E-01        | 7.4E-02        | 9.1E-09              | 4                     | 1.8E-02        | 3.7E-01        | 5.4E-02              | 3                     | 7.9E-01        | 3.1E-01        | 6.5E-01              | 4                     |
| rs11993          | rs17340646        | 1        | 173418019        | 7        | 129082460        | 2.2E-01        | 7.4E-02        | 8.9E-09              | 4                     | 1.5E-02        | 3.6E-01        | 6.3E-02              | 3                     | 8.3E-01        | 3.1E-01        | 5.6E-01              | 4                     |
| rs4279882        | rs17340646        | 1        | 173418803        | 7        | 129082460        | 2.1E-01        | 7.4E-02        | 8.7E-09              | 4                     | 1.2E-02        | 4.1E-01        | 6.0E-02              | 3                     | N/A            | N/A            | N/A                  | N/A                   |
| <b>rs6425230</b> | <b>rs17340646</b> | <b>1</b> | <b>173418899</b> | <b>7</b> | <b>129082460</b> | <b>2.8E-01</b> | <b>7.2E-02</b> | <b>4.9E-09</b>       | <b>4</b>              | <b>3.4E-02</b> | <b>4.1E-01</b> | <b>3.6E-02</b>       | <b>4</b>              | <b>6.9E-01</b> | <b>3.7E-01</b> | <b>4.6E-01</b>       | <b>4</b>              |
| rs12136685       | rs6496518         | 1        | 8131732          | 15       | 88688433         | 4.1E-01        | 2.1E-01        | 3.7E-09              | 4                     | 4.1E-01        | 4.7E-01        | 8.9E-01              | 4                     | 5.9E-01        | 6.5E-01        | 7.9E-02              | 4                     |
| rs12136685       | rs4244884         | 1        | 8131732          | 15       | 88689059         | 4.1E-01        | 3.0E-01        | 2.6E-09              | 4                     | 4.1E-01        | 4.8E-01        | 8.9E-01              | 4                     | 5.9E-01        | 6.9E-01        | 8.5E-02              | 4                     |
| rs12133365       | rs6496518         | 1        | 8131760          | 15       | 88688433         | 4.1E-01        | 2.1E-01        | 3.6E-09              | 4                     | 4.3E-01        | 4.6E-01        | 8.9E-01              | 4                     | 5.9E-01        | 6.5E-01        | 7.9E-02              | 4                     |
| rs12133365       | rs4244884         | 1        | 8131760          | 15       | 88689059         | 4.1E-01        | 3.0E-01        | 2.6E-09              | 4                     | 4.3E-01        | 4.8E-01        | 8.9E-01              | 4                     | 5.9E-01        | 6.9E-01        | 8.7E-02              | 4                     |
| rs12144409       | rs6496518         | 1        | 8131829          | 15       | 88688433         | 4.0E-01        | 2.1E-01        | 3.8E-09              | 4                     | 4.2E-01        | 4.7E-01        | 8.9E-01              | 4                     | 5.9E-01        | 6.5E-01        | 7.9E-02              | 4                     |
| rs12144409       | rs4244884         | 1        | 8131829          | 15       | 88689059         | 4.0E-01        | 3.0E-01        | 2.7E-09              | 4                     | 4.2E-01        | 4.9E-01        | 8.9E-01              | 4                     | 5.9E-01        | 6.9E-01        | 8.5E-02              | 4                     |
| rs11121105       | rs6496518         | 1        | 8132035          | 15       | 88688433         | 4.8E-01        | 2.1E-01        | 3.6E-09              | 4                     | 5.0E-01        | 4.6E-01        | 8.7E-01              | 4                     | 5.9E-01        | 6.5E-01        | 9.8E-02              | 4                     |
| rs11121105       | rs4244884         | 1        | 8132035          | 15       | 88689059         | 4.8E-01        | 3.0E-01        | 2.6E-09              | 4                     | 5.0E-01        | 4.8E-01        | 8.7E-01              | 4                     | 5.9E-01        | 6.9E-01        | 1.0E-01              | 4                     |
| rs7534867        | rs6496518         | 1        | 8132566          | 15       | 88688433         | 5.0E-01        | 2.1E-01        | 3.2E-09              | 4                     | 4.4E-01        | 4.8E-01        | 8.9E-01              | 4                     | 5.8E-01        | 6.6E-01        | 7.9E-02              | 4                     |
| rs7534867        | rs4244884         | 1        | 8132566          | 15       | 88689059         | 5.0E-01        | 3.0E-01        | 2.2E-09              | 4                     | 4.4E-01        | 4.9E-01        | 8.9E-01              | 4                     | 5.8E-01        | 7.1E-01        | 8.5E-02              | 4                     |
| rs12566369       | rs6496518         | 1        | 8132865          | 15       | 88688433         | 4.5E-01        | 2.1E-01        | 6.9E-09              | 4                     | 3.0E-01        | 4.7E-01        | 7.6E-01              | 4                     | 5.6E-01        | 6.9E-01        | 7.2E-02              | 4                     |
| rs12566369       | rs4244884         | 1        | 8132865          | 15       | 88689059         | 4.5E-01        | 3.0E-01        | 4.9E-09              | 4                     | 3.0E-01        | 4.9E-01        | 7.6E-01              | 4                     | 5.6E-01        | 7.4E-01        | 7.9E-02              | 4                     |
| rs4488803        | rs1974226         | 3        | 58232625         | 6        | 52190537         | 5.5E-01        | 4.1E-01        | 1.9E-10              | 4                     | 1.9E-01        | 1.0E-02        | 6.2E-01              | 4                     | 9.3E-01        | 1.1E-02        | 9.3E-01              | 4                     |
| rs750870         | rs17644694        | 3        | 143081209        | 14       | 43352880         | 1.9E-01        | 9.1E-01        | 7.2E-09              | 4                     | 4.8E-01        | 1.0E-01        | 8.5E-01              | 4                     | 1.7E-01        | 9.8E-01        | 1.9E-01              | 4                     |
| rs750870         | rs11157350        | 3        | 143081209        | 14       | 43355572         | 1.9E-01        | 9.1E-01        | 9.8E-09              | 4                     | 4.8E-01        | 1.3E-01        | 7.9E-01              | 4                     | 1.7E-01        | 9.8E-01        | 1.9E-01              | 4                     |
| rs67042607       | rs11246234        | 6        | 167001916        | 11       | 645336           | 5.5E-01        | 1.6E-01        | 1.0E-08              | 4                     | N/A            | N/A            | N/A                  | N/A                   | N/A            | N/A            | N/A                  | N/A                   |
| rs9459835        | rs11246234        | 6        | 167004063        | 11       | 645336           | 5.6E-01        | 1.5E-01        | 1.1E-08              | 4                     | N/A            | N/A            | N/A                  | N/A                   | N/A            | N/A            | N/A                  | N/A                   |
| rs4710171        | rs11246234        | 6        | 167016698        | 11       | 645336           | 4.1E-01        | 1.6E-01        | 4.8E-09              | 4                     | N/A            | N/A            | N/A                  | N/A                   | N/A            | N/A            | N/A                  | N/A                   |
| rs9459839        | rs11246234        | 6        | 167018341        | 11       | 645336           | 5.0E-01        | 1.6E-01        | 1.0E-08              | 4                     | N/A            | N/A            | N/A                  | N/A                   | N/A            | N/A            | N/A                  | N/A                   |
| rs1894603        | rs11246234        | 6        | 167021198        | 11       | 645336           | 5.4E-01        | 1.5E-01        | 1.0E-08              | 4                     | N/A            | N/A            | N/A                  | N/A                   | N/A            | N/A            | N/A                  | N/A                   |

|                              |                  |           |                  |           |                 |                |                |                |          |                |                |                |          |                |                |                |          |
|------------------------------|------------------|-----------|------------------|-----------|-----------------|----------------|----------------|----------------|----------|----------------|----------------|----------------|----------|----------------|----------------|----------------|----------|
| rs7749278                    | rs11246234       | 6         | 167021837        | 11        | 645336          | 5.6E-01        | 1.6E-01        | 1.1E-08        | 4        | N/A            | N/A            | N/A            | N/A      | N/A            | N/A            | N/A            | N/A      |
| rs3833941                    | rs11246234       | 6         | 167022310        | 11        | 645336          | 5.5E-01        | 1.6E-01        | 1.0E-08        | 4        | N/A            | N/A            | N/A            | N/A      | N/A            | N/A            | N/A            | N/A      |
| rs2301436                    | rs11246234       | 6         | 167024500        | 11        | 645336          | 5.5E-01        | 1.5E-01        | 9.8E-09        | 4        | N/A            | N/A            | N/A            | N/A      | N/A            | N/A            | N/A            | N/A      |
| rs2282861                    | rs11246234       | 6         | 167026640        | 11        | 645336          | 5.5E-01        | 1.6E-01        | 9.5E-09        | 4        | N/A            | N/A            | N/A            | N/A      | N/A            | N/A            | N/A            | N/A      |
| rs2282860                    | rs11246234       | 6         | 167026756        | 11        | 645336          | 5.4E-01        | 1.7E-01        | 9.5E-09        | 4        | N/A            | N/A            | N/A            | N/A      | N/A            | N/A            | N/A            | N/A      |
| rs9459845                    | rs11246234       | 6         | 167027013        | 11        | 645336          | 5.4E-01        | 1.6E-01        | 9.3E-09        | 4        | N/A            | N/A            | N/A            | N/A      | N/A            | N/A            | N/A            | N/A      |
| rs9457257                    | rs11246234       | 6         | 167027248        | 11        | 645336          | 5.2E-01        | 1.6E-01        | 9.8E-09        | 4        | N/A            | N/A            | N/A            | N/A      | N/A            | N/A            | N/A            | N/A      |
| ccc-<br>6N/A67360950-<br>T-A | rs11246234       | 6         | 167027473        | 11        | 645336          | 5.2E-01        | 1.6E-01        | 1.0E-08        | 4        | N/A            | N/A            | N/A            | N/A      | N/A            | N/A            | N/A            | N/A      |
| rs61710173                   | rs11246234       | 6         | 167027476        | 11        | 645336          | 5.2E-01        | 1.6E-01        | 1.0E-08        | 4        | N/A            | N/A            | N/A            | N/A      | N/A            | N/A            | N/A            | N/A      |
| rs9459846                    | rs11246234       | 6         | 167027535        | 11        | 645336          | 5.2E-01        | 1.6E-01        | 9.5E-09        | 4        | N/A            | N/A            | N/A            | N/A      | N/A            | N/A            | N/A            | N/A      |
| rs2181059                    | rs11246234       | 6         | 167028136        | 11        | 645336          | 5.5E-01        | 1.6E-01        | 1.0E-08        | 4        | N/A            | N/A            | N/A            | N/A      | N/A            | N/A            | N/A            | N/A      |
| rs2237277                    | rs11246234       | 6         | 167028619        | 11        | 645336          | 5.5E-01        | 1.6E-01        | 1.0E-08        | 4        | N/A            | N/A            | N/A            | N/A      | N/A            | N/A            | N/A            | N/A      |
| rs2237273                    | rs11246234       | 6         | 167029529        | 11        | 645336          | 5.2E-01        | 1.6E-01        | 9.5E-09        | 4        | N/A            | N/A            | N/A            | N/A      | N/A            | N/A            | N/A            | N/A      |
| rs9295384                    | rs11246234       | 6         | 167034625        | 11        | 645336          | 4.8E-01        | 1.6E-01        | 1.1E-08        | 4        | N/A            | N/A            | N/A            | N/A      | N/A            | N/A            | N/A            | N/A      |
| rs34458103                   | rs11246234       | 6         | 167034890        | 11        | 645336          | 4.9E-01        | 1.6E-01        | 1.1E-08        | 4        | N/A            | N/A            | N/A            | N/A      | N/A            | N/A            | N/A            | N/A      |
| rs6466198                    | rs2173577        | 7         | 107839681        | 8         | 74135771        | 7.2E-01        | 8.9E-02        | 6.6E-09        | 4        | 4.8E-01        | 3.9E-01        | 1.0E+00        | 4        | 2.8E-01        | 2.8E-01        | 2.5E-01        | 4        |
| rs6466198                    | rs2173576        | 7         | 107839681        | 8         | 74135805        | 7.1E-01        | 1.0E-01        | 6.9E-09        | 4        | 4.8E-01        | 3.1E-01        | 1.0E+00        | 4        | 2.8E-01        | 3.2E-01        | 2.6E-01        | 4        |
| rs10269037                   | rs2836831        | 7         | 37336846         | 21        | 39014453        | 4.6E-01        | 8.3E-01        | 2.9E-09        | 4        | 9.3E-01        | 8.9E-01        | 7.9E-01        | 4        | 9.8E-01        | 2.6E-01        | 5.8E-02        | 4        |
| rs10239448                   | rs2836831        | 7         | 37336878         | 21        | 39014453        | 4.6E-01        | 8.3E-01        | 2.5E-09        | 4        | 9.3E-01        | 8.9E-01        | 7.9E-01        | 4        | 9.8E-01        | 2.7E-01        | 5.6E-02        | 4        |
| rs4720243                    | rs2836831        | 7         | 37337976         | 21        | 39014453        | 4.2E-01        | 8.3E-01        | 4.2E-09        | 4        | 9.5E-01        | 8.9E-01        | 7.9E-01        | 4        | 9.8E-01        | 2.9E-01        | 6.5E-02        | 4        |
| rs7804200                    | rs2836831        | 7         | 37339514         | 21        | 39014453        | 4.2E-01        | 8.3E-01        | 2.7E-09        | 4        | 9.5E-01        | 8.9E-01        | 7.9E-01        | 4        | 9.8E-01        | 2.7E-01        | 5.2E-02        | 4        |
| rs2133165                    | rs3790036        | 11        | 36530697         | 14        | 94306784        | 5.6E-01        | 2.1E-01        | 3.3E-09        | 4        | 1.4E-01        | 7.4E-01        | 5.6E-01        | 4        | 3.4E-01        | 1.5E-01        | 4.1E-01        | 3        |
| <b>rs17547025</b>            | <b>rs9806697</b> | <b>12</b> | <b>102932492</b> | <b>15</b> | <b>47778596</b> | <b>5.0E-02</b> | <b>2.1E-01</b> | <b>8.3E-09</b> | <b>4</b> | <b>3.2E-01</b> | <b>2.4E-01</b> | <b>2.6E-02</b> | <b>4</b> | <b>5.2E-01</b> | <b>7.6E-01</b> | <b>9.5E-01</b> | <b>4</b> |

\*: SNP1 (SNP2): the first (second) epistatic SNP; chr1 (chr2): the chromosome of SNP1 (SNP2); pos1 (pos2): the base pair position of SNP1 (SNP2); P\_SNP1\_UK, P\_SNP2\_UK, P\_int\_UK, df\_int\_UK: the P value of SNP1, SNP2 and their interactions and degrees of freedom of the interactions in RACI-UK; P\_SNP1\_US, P\_SNP2\_US, P\_int\_US, df\_int\_US: the P value of SNP1, SNP2 and their interactions and degrees of freedom of the interactions in RACI-US; P\_SNP1\_SE, P\_SNP2\_SE, P\_int\_SE, df\_int\_SE: the P value of SNP1, SNP2 and their interactions and degrees of freedom of the interactions in RACI-SE; N/A: at least one SNP had no genotypes available; epistatic pair in bold was reported.

Supplementary Table 3: non-MHC local interactions in RACI-UK and their replication in RACI-US and RACI-SE.

| SNP1              | SNP2              | chr      | pos1             | pos2             | P_SNP1_UK      | P_SNP2_UK      | P <sub>int</sub> _UK | df <sub>int</sub> _UK | LD          | P_SNP1_US      | P_SNP2_US      | P <sub>int</sub> _US | df <sub>int</sub> _US | P_SNP1_SE      | P_SNP2_SE      | P <sub>int</sub> _SE | df <sub>int</sub> _SE |
|-------------------|-------------------|----------|------------------|------------------|----------------|----------------|----------------------|-----------------------|-------------|----------------|----------------|----------------------|-----------------------|----------------|----------------|----------------------|-----------------------|
| rs10158092        | rs6667256         | 1        | 19211261         | 19868189         | 5.5E-01        | 5.1E-01        | 1.8E-06              | 4                     | 0.00        | 1.5E-01        | 2.3E-01        | 6.5E-01              | 4                     | 2.0E-01        | 9.1E-01        | 5.4E-02              | 4                     |
| rs10158092        | rs6670226         | 1        | 19211261         | 19868209         | 5.5E-01        | 5.0E-01        | 1.9E-06              | 4                     | 0.00        | 1.5E-01        | 2.8E-01        | 6.3E-01              | 4                     | 2.0E-01        | 9.1E-01        | 5.4E-02              | 4                     |
| rs10158092        | rs7553638         | 1        | 19211261         | 19872444         | 5.5E-01        | 4.9E-01        | 2.0E-06              | 4                     | 0.00        | 1.6E-01        | 2.5E-01        | 6.0E-01              | 4                     | 2.0E-01        | 8.9E-01        | 5.4E-02              | 4                     |
| rs10158092        | rs4654903         | 1        | 19211261         | 19874497         | 5.5E-01        | 5.2E-01        | 1.1E-06              | 4                     | 0.00        | 1.6E-01        | 2.5E-01        | 6.2E-01              | 4                     | 2.0E-01        | 8.9E-01        | 5.4E-02              | 4                     |
| rs10158092        | rs6674040         | 1        | 19211261         | 19875420         | 5.5E-01        | 5.2E-01        | 1.1E-06              | 4                     | 0.00        | 1.6E-01        | 2.5E-01        | 6.2E-01              | 4                     | 2.0E-01        | 8.9E-01        | 5.4E-02              | 4                     |
| rs75328060        | rs41458747        | 1        | 67231386         | 67414659         | 5.0E-01        | 3.7E-01        | 3.5E-06              | 4                     | 0.01        | 2.1E-01        | 2.2E-01        | 1.1E-01              | 4                     | 2.5E-01        | 1.9E-01        | 4.5E-01              | 3                     |
| rs78254060        | rs41458747        | 1        | 67232186         | 67414659         | 5.6E-01        | 3.7E-01        | 4.0E-06              | 4                     | 0.01        | 2.0E-01        | 2.3E-01        | 1.1E-01              | 4                     | 2.6E-01        | 1.9E-01        | 4.6E-01              | 3                     |
| rs11465804        | rs17129935        | 1        | 67236843         | 67385724         | 6.6E-01        | 3.5E-01        | 6.6E-06              | 4                     | 0.01        | 4.0E-01        | 2.0E-01        | 8.9E-02              | 4                     | 1.2E-01        | 2.1E-01        | 5.2E-01              | 3                     |
| rs11465804        | rs41458747        | 1        | 67236843         | 67414659         | 6.6E-01        | 4.0E-01        | 1.6E-06              | 4                     | 0.01        | 4.0E-01        | 2.1E-01        | 1.4E-01              | 4                     | 1.3E-01        | 2.1E-01        | 5.2E-01              | 3                     |
| rs11209026        | rs17129935        | 1        | 67240275         | 67385724         | 6.9E-01        | 3.5E-01        | 8.9E-06              | 4                     | 0.01        | 6.5E-01        | 2.1E-01        | 2.5E-01              | 4                     | 9.3E-02        | 2.1E-01        | 2.8E-01              | 3                     |
| rs11209026        | rs41458747        | 1        | 67240275         | 67414659         | 6.9E-01        | 4.0E-01        | 2.3E-06              | 4                     | 0.01        | 6.5E-01        | 2.1E-01        | 3.3E-01              | 4                     | 1.0E-01        | 2.1E-01        | 2.9E-01              | 3                     |
| rs80174646        | rs17129935        | 1        | 67242472         | 67385724         | 6.3E-01        | 3.1E-01        | 9.3E-06              | 4                     | 0.01        | 4.0E-01        | 2.3E-01        | 1.4E-01              | 4                     | 1.4E-01        | 1.9E-01        | 3.1E-01              | 3                     |
| rs80174646        | rs41458747        | 1        | 67242472         | 67414659         | 6.2E-01        | 3.7E-01        | 2.5E-06              | 4                     | 0.01        | 4.1E-01        | 2.3E-01        | 2.2E-01              | 4                     | 1.5E-01        | 1.9E-01        | 3.2E-01              | 3                     |
| rs9988642         | rs17129935        | 1        | 67260421         | 67385724         | 7.1E-01        | 3.2E-01        | 3.3E-06              | 4                     | 0.01        | 3.8E-01        | 2.3E-01        | 1.2E-01              | 4                     | 1.3E-01        | 2.0E-01        | 2.9E-01              | 3                     |
| rs9988642         | rs41458747        | 1        | 67260421         | 67414659         | 7.1E-01        | 3.7E-01        | 8.1E-07              | 4                     | 0.01        | 3.9E-01        | 2.3E-01        | 1.9E-01              | 4                     | 1.4E-01        | 2.0E-01        | 3.0E-01              | 3                     |
| rs72685702        | rs10108           | 1        | 113376639        | 113973708        | 6.3E-07        | 3.0E-03        | 6.3E-06              | 4                     | 0.01        | 6.9E-05        | 1.1E-01        | 1.2E-01              | 4                     | 3.7E-01        | 4.1E-02        | 6.6E-01              | 4                     |
| rs1230661         | rs57195252        | 1        | 113642968        | 113938965        | 2.1E-14        | 3.6E-04        | 4.8E-06              | 4                     | 0.12        | 2.2E-03        | 3.2E-01        | 8.5E-05              | 4                     | 2.8E-06        | 2.8E-02        | 4.7E-01              | 4                     |
| rs2359167         | rs57195252        | 1        | 113756894        | 113938965        | 3.0E-14        | 6.2E-04        | 5.1E-06              | 4                     | 0.12        | 3.0E-03        | 3.3E-01        | 4.4E-05              | 4                     | 1.0E-06        | 3.5E-02        | 5.2E-01              | 4                     |
| rs61817589        | rs57195252        | 1        | 113758713        | 113938965        | 2.2E-09        | 1.6E-09        | 5.0E-06              | 4                     | 0.12        | 7.9E-03        | 6.6E-02        | 4.8E-05              | 4                     | 1.9E-03        | 3.6E-05        | 4.9E-01              | 4                     |
| rs4145859         | rs57195252        | 1        | 113769813        | 113938965        | 1.2E-14        | 4.1E-04        | 4.9E-06              | 4                     | 0.12        | 2.3E-03        | 3.1E-01        | 3.2E-05              | 4                     | 1.5E-06        | 3.6E-02        | 5.1E-01              | 4                     |
| rs12041547        | rs57195252        | 1        | 113773598        | 113938965        | 1.7E-14        | 4.0E-04        | 5.0E-06              | 4                     | 0.12        | 3.1E-03        | 3.0E-01        | 5.5E-05              | 4                     | 1.8E-06        | 3.3E-02        | 5.2E-01              | 4                     |
| rs1217413         | rs57195252        | 1        | 113815128        | 113938965        | 6.9E-15        | 4.6E-04        | 5.4E-06              | 4                     | 0.12        | 2.9E-03        | 3.2E-01        | 6.0E-05              | 4                     | 2.9E-06        | 3.0E-02        | 4.8E-01              | 4                     |
| rs2488457         | rs57195252        | 1        | 113872746        | 113938965        | 5.1E-16        | 1.1E-03        | 3.7E-06              | 4                     | 0.13        | 5.8E-03        | 3.1E-01        | 2.8E-04              | 4                     | 2.4E-05        | 1.9E-02        | 3.2E-01              | 4                     |
| <b>rs2488457</b>  | <b>rs17032048</b> | <b>1</b> | <b>113872746</b> | <b>113984753</b> | <b>3.0E-11</b> | <b>5.8E-08</b> | <b>6.9E-06</b>       | <b>4</b>              | <b>0.11</b> | <b>1.9E-02</b> | <b>1.6E-01</b> | <b>1.4E-05</b>       | <b>4</b>              | <b>3.0E-03</b> | <b>2.1E-04</b> | <b>4.1E-01</b>       | <b>4</b>              |
| rs2358816         | rs57195252        | 1        | 113876746        | 113938965        | 5.9E-16        | 1.2E-03        | 5.5E-06              | 4                     | 0.13        | 5.9E-03        | 2.8E-01        | 1.3E-04              | 4                     | 2.4E-05        | 1.9E-02        | 3.0E-01              | 4                     |
| rs2358816         | rs17032048        | 1        | 113876746        | 113984753        | 3.7E-11        | 5.1E-08        | 8.7E-06              | 4                     | 0.11        | 1.7E-02        | 1.6E-01        | 7.4E-06              | 4                     | 3.2E-03        | 2.1E-04        | 3.9E-01              | 4                     |
| rs12711109        | rs6840978         | 4        | 122091415        | 122633552        | 1.4E-01        | 4.8E-02        | 2.9E-06              | 4                     | 0.04        | 6.2E-01        | 1.1E-01        | 3.2E-01              | 4                     | 2.0E-01        | 9.1E-02        | 2.7E-02              | 4                     |
| <b>rs12711109</b> | <b>rs10518402</b> | <b>4</b> | <b>122091415</b> | <b>122633635</b> | <b>3.4E-01</b> | <b>2.4E-02</b> | <b>2.5E-06</b>       | <b>4</b>              | <b>0.04</b> | <b>5.5E-01</b> | <b>1.6E-01</b> | <b>3.4E-01</b>       | <b>4</b>              | <b>1.0E-01</b> | <b>1.7E-01</b> | <b>2.8E-02</b>       | <b>4</b>              |

|             |             |    |           |           |         |         |         |   |      |         |         |         |     |         |         |         |   |
|-------------|-------------|----|-----------|-----------|---------|---------|---------|---|------|---------|---------|---------|-----|---------|---------|---------|---|
| rs58729991  | rs6840978   | 4  | 122094382 | 122633552 | 1.6E-01 | 4.7E-02 | 3.0E-06 | 4 | 0.04 | 6.6E-01 | 1.1E-01 | 3.1E-01 | 4   | 2.0E-01 | 9.1E-02 | 2.7E-02 | 4 |
| rs58729991  | rs10518402  | 4  | 122094382 | 122633635 | 3.6E-01 | 2.3E-02 | 2.6E-06 | 4 | 0.04 | 5.9E-01 | 1.6E-01 | 3.3E-01 | 4   | 1.0E-01 | 1.7E-01 | 2.8E-02 | 4 |
| rs11931332  | rs10518402  | 4  | 122095572 | 122633635 | 3.8E-01 | 2.3E-02 | 3.5E-06 | 4 | 0.04 | 4.4E-01 | 1.6E-01 | 2.2E-01 | 4   | 1.2E-01 | 1.7E-01 | 3.0E-02 | 4 |
| rs11936230  | rs6840978   | 4  | 122095600 | 122633552 | 1.4E-01 | 4.7E-02 | 3.0E-06 | 4 | 0.04 | 6.3E-01 | 1.1E-01 | 3.0E-01 | 4   | 2.1E-01 | 9.3E-02 | 2.6E-02 | 4 |
| rs11936230  | rs10518402  | 4  | 122095600 | 122633635 | 3.4E-01 | 2.3E-02 | 2.5E-06 | 4 | 0.04 | 5.6E-01 | 1.6E-01 | 3.2E-01 | 4   | 1.1E-01 | 1.8E-01 | 2.8E-02 | 4 |
| rs252160    | rs75970310  | 5  | 150707683 | 151088562 | 1.6E-01 | 7.9E-02 | 9.3E-06 | 4 | 0.00 | 8.5E-02 | 3.1E-01 | 2.1E-01 | 4   | 6.0E-01 | 2.1E-01 | 6.6E-01 | 4 |
| rs252160    | rs77102485  | 5  | 150707683 | 151095151 | 1.6E-01 | 2.3E-01 | 5.1E-06 | 4 | 0.00 | 7.9E-02 | 2.5E-01 | 3.2E-01 | 4   | 6.8E-01 | 1.7E-01 | 3.5E-01 | 4 |
| rs1569699   | rs1459042   | 6  | 20679079  | 21236316  | 4.1E-01 | 3.5E-01 | 2.3E-06 | 4 | 0.00 | 3.0E-01 | 4.3E-01 | 1.9E-01 | 4   | 2.5E-02 | 8.7E-01 | 6.6E-01 | 4 |
| rs1569699   | rs1459042   | 6  | 20679079  | 21236316  | 4.1E-01 | 3.5E-01 | 2.3E-06 | 4 | 0.00 | 3.0E-01 | 4.3E-01 | 1.9E-01 | 4   | 2.5E-02 | 8.7E-01 | 6.6E-01 | 4 |
| rs9350271   | rs1459042   | 6  | 20682933  | 21236316  | 4.6E-01 | 2.8E-01 | 2.3E-06 | 4 | 0.00 | 3.7E-01 | 4.5E-01 | 1.7E-01 | 4   | 2.0E-02 | 8.5E-01 | 7.1E-01 | 4 |
| rs9350271   | rs1459042   | 6  | 20682933  | 21236316  | 4.6E-01 | 2.8E-01 | 2.3E-06 | 4 | 0.00 | 3.7E-01 | 4.5E-01 | 1.7E-01 | 4   | 2.0E-02 | 8.5E-01 | 7.1E-01 | 4 |
| rs9356744   | rs1459042   | 6  | 20685255  | 21236316  | 4.3E-01 | 3.0E-01 | 2.1E-06 | 4 | 0.00 | 3.7E-01 | 4.5E-01 | 1.4E-01 | 4   | 2.2E-02 | 8.7E-01 | 6.5E-01 | 4 |
| rs9356744   | rs1459042   | 6  | 20685255  | 21236316  | 4.3E-01 | 3.0E-01 | 2.1E-06 | 4 | 0.00 | 3.7E-01 | 4.5E-01 | 1.4E-01 | 4   | 2.2E-02 | 8.7E-01 | 6.5E-01 | 4 |
| rs74774781  | rs2922248   | 6  | 126969352 | 127632845 | 6.6E-01 | 8.5E-01 | 2.8E-06 | 4 | 0.00 | 3.0E-01 | 2.7E-01 | 7.8E-01 | 4   | 5.1E-01 | 1.6E-01 | 3.1E-01 | 4 |
| rs74774781  | rs2922248   | 6  | 126969352 | 127632845 | 6.6E-01 | 8.5E-01 | 2.8E-06 | 4 | 0.00 | 3.0E-01 | 2.7E-01 | 7.8E-01 | 4   | 5.1E-01 | 1.6E-01 | 3.1E-01 | 4 |
| rs61198215  | rs2529395   | 7  | 50290101  | 50624341  | 8.3E-01 | 7.9E-01 | 1.6E-06 | 4 | 0.00 | N/A     | N/A     | N/A     | N/A | 3.5E-02 | 1.8E-01 | 7.9E-01 | 4 |
| rs2366034   | rs2529396   | 7  | 50291660  | 50619631  | 7.8E-01 | 6.8E-01 | 6.5E-06 | 4 | 0.00 | 6.6E-01 | 1.4E-02 | 5.2E-01 | 4   | 2.8E-02 | 1.7E-01 | 8.9E-01 | 4 |
| rs2366034   | rs2529395   | 7  | 50291660  | 50624341  | 7.8E-01 | 7.8E-01 | 6.8E-07 | 4 | 0.00 | 6.5E-01 | 1.2E-02 | 6.0E-01 | 4   | 3.2E-02 | 1.7E-01 | 7.9E-01 | 4 |
| rs117518292 | rs17799348  | 8  | 10967931  | 11476012  | 8.3E-02 | 3.5E-01 | 1.8E-06 | 4 | 0.00 | 1.8E-01 | 1.1E-02 | 8.9E-01 | 3   | 1.0E-01 | 7.4E-02 | 9.3E-01 | 3 |
| rs16922296  | rs111880687 | 8  | 55867106  | 55951597  | 1.3E-01 | 7.4E-01 | 3.7E-06 | 4 | 0.04 | N/A     | N/A     | N/A     | N/A | 7.6E-01 | 1.4E-01 | 3.2E-01 | 3 |
| rs7832803   | rs6651252   | 8  | 128149394 | 128554935 | 4.8E-01 | 3.1E-03 | 5.8E-06 | 4 | 0.00 | 5.2E-02 | 7.6E-03 | 3.0E-01 | 4   | 1.3E-01 | 4.5E-01 | 6.8E-01 | 4 |
| rs1272633   | rs60472814  | 10 | 79305751  | 79317687  | 6.8E-01 | 6.6E-01 | 8.9E-06 | 4 | 0.02 | 4.7E-02 | 2.5E-01 | 6.9E-02 | 4   | 6.6E-01 | 1.6E-02 | 8.3E-01 | 4 |
| rs117397946 | rs9567450   | 13 | 43988893  | 44634608  | 5.0E-01 | 4.1E-01 | 2.6E-06 | 4 | 0.00 | 5.4E-01 | 6.3E-01 | 6.0E-01 | 2   | 4.8E-01 | 1.9E-02 | 2.2E-02 | 4 |
| rs1038037   | rs7150847   | 14 | 97988123  | 98348719  | 8.1E-01 | 4.2E-01 | 5.1E-06 | 4 | 0.00 | 4.1E-01 | 6.8E-01 | 7.2E-01 | 4   | 7.1E-01 | 8.9E-01 | 3.1E-01 | 4 |
| rs1038037   | rs10138940  | 14 | 97988123  | 98350498  | 8.1E-01 | 4.9E-01 | 4.6E-06 | 4 | 0.00 | 4.2E-01 | 6.9E-01 | 7.1E-01 | 4   | 6.9E-01 | 8.7E-01 | 3.0E-01 | 4 |
| rs73164749  | rs7289095   | 22 | 30181669  | 30262733  | 8.9E-02 | 6.2E-02 | 7.8E-06 | 4 | 0.13 | 1.6E-01 | 8.7E-01 | 8.9E-01 | 4   | 9.1E-01 | 5.6E-01 | 5.6E-01 | 4 |
| rs73164752  | rs7289095   | 22 | 30184512  | 30262733  | 9.3E-01 | 6.6E-02 | 4.6E-06 | 4 | 0.15 | 7.9E-02 | 8.7E-01 | 4.8E-01 | 3   | 4.3E-01 | 5.6E-01 | 3.8E-01 | 3 |

\*: SNP1 (SNP2): the first (second) epistatic SNP; chr: the chromosome of the local interaction SNPs; pos1 (pos2): the base pair position of SNP1 (SNP2); P\_SNP1\_UK, P\_SNP2\_UK, P<sub>int</sub>\_UK, df<sub>int</sub>\_UK: the P value of SNP1, SNP2 and their interactions and degrees of freedom of the interactions in RACI-UK; P\_SNP1\_US, P\_SNP2\_US, P<sub>int</sub>\_US, df<sub>int</sub>\_US: the P value of SNP1, SNP2 and their interactions and degrees of freedom of the interactions in RACI-US; P\_SNP1\_SE, P\_SNP2\_SE, P<sub>int</sub>\_SE, df<sub>int</sub>\_SE: the P value of SNP1, SNP2 and their interactions and degrees of freedom of the interactions in RACI-SE; N/A: at least one SNP had no genotypes available; epistatic pair in bold was reported
